# Supplementary material for: Acidic bile salts induces mucosal barrier dysfunction through let-7a reduction during gastric carcinogenesis after Helicobacter pylori eradication
Source: PubMed Central journal article supplement (PMC5915058; doi:10.18632/oncotarget.24725), 2018-04-06
Supplement: oncotarget-09-18069-s001.pdf [file oncotarget-09-18069-s001.pdf]

## Acidic bile salts induces mucosal barrier dysfunction through *let-7a* reduction during gastric carcinogenesis after *Helicobacter pylori* eradication

### SUPPLEMENTARY MATERIALS

**Supplementary Table 1: The background data and demographics of the subjects**

|                                                  |                         |             |
|--------------------------------------------------|-------------------------|-------------|
| N                                                |                         | 18          |
| Age (mean (S.D.))                                |                         | 74.0 (7.6)  |
| Gender (Male/ Female)                            |                         | 15/3        |
| Duration after eradication (mean (S. D.) months) |                         | 74.8 (51.5) |
| Mucosal atrophy in Endoscopic findings           |                         |             |
| White light                                      | C1-2/ C3-O1/ O2-3       | 2/ 6/ 10    |
| Congo-red endoscopy                              | C1-2/ C3-O1/ O2-3       | 3/ 7/8      |
| Gastric Cancer                                   |                         |             |
| location                                         | U/M/L                   | 3/ 1/ 14    |
| Size (mean (S.D.) mm)                            |                         | 12.5 (13.9) |
| Macroscopic type                                 | Protruded/ depressed    | 2/ 16       |
| Tumor staging                                    | T1a/ T1b-               | 15/ 3       |
| Histological type                                | Wel-mod/ por-sig/ mixed | 18/0/0      |

The endoscopic findings of tumor location, macroscopic type and tumor size were classified based on the classification for Gastric Cancer (Japanese Classification of Gastric Carcinoma - 2nd English Edition. Gastric cancer). The extent of corpus atrophy was assessed and categorized by the Kimura-Takemoto classification. (S.D.; standard deviation).

**Supplementary Table 2: The updated Sydney system for post-eradication gastric mucosa**

|              |         | Acid non-secreting area | Acid secreting area | p-value  |
|--------------|---------|-------------------------|---------------------|----------|
| Inflammation | 0/1/2/3 | 0/4/14/0                | 0/17/1/0            | P<0.0001 |
| Activity     | 0/1/2/3 | 18/0/0/0                | 18/0/0/0            | -        |
| atrophy      | 0/1/2/3 | 2/1/1/14                | 16/1/0/1            | P<0.0001 |
| metaplasia   | 0/1/2/3 | 1/2/0/15                | 15/2/0/1            | P<0.0001 |

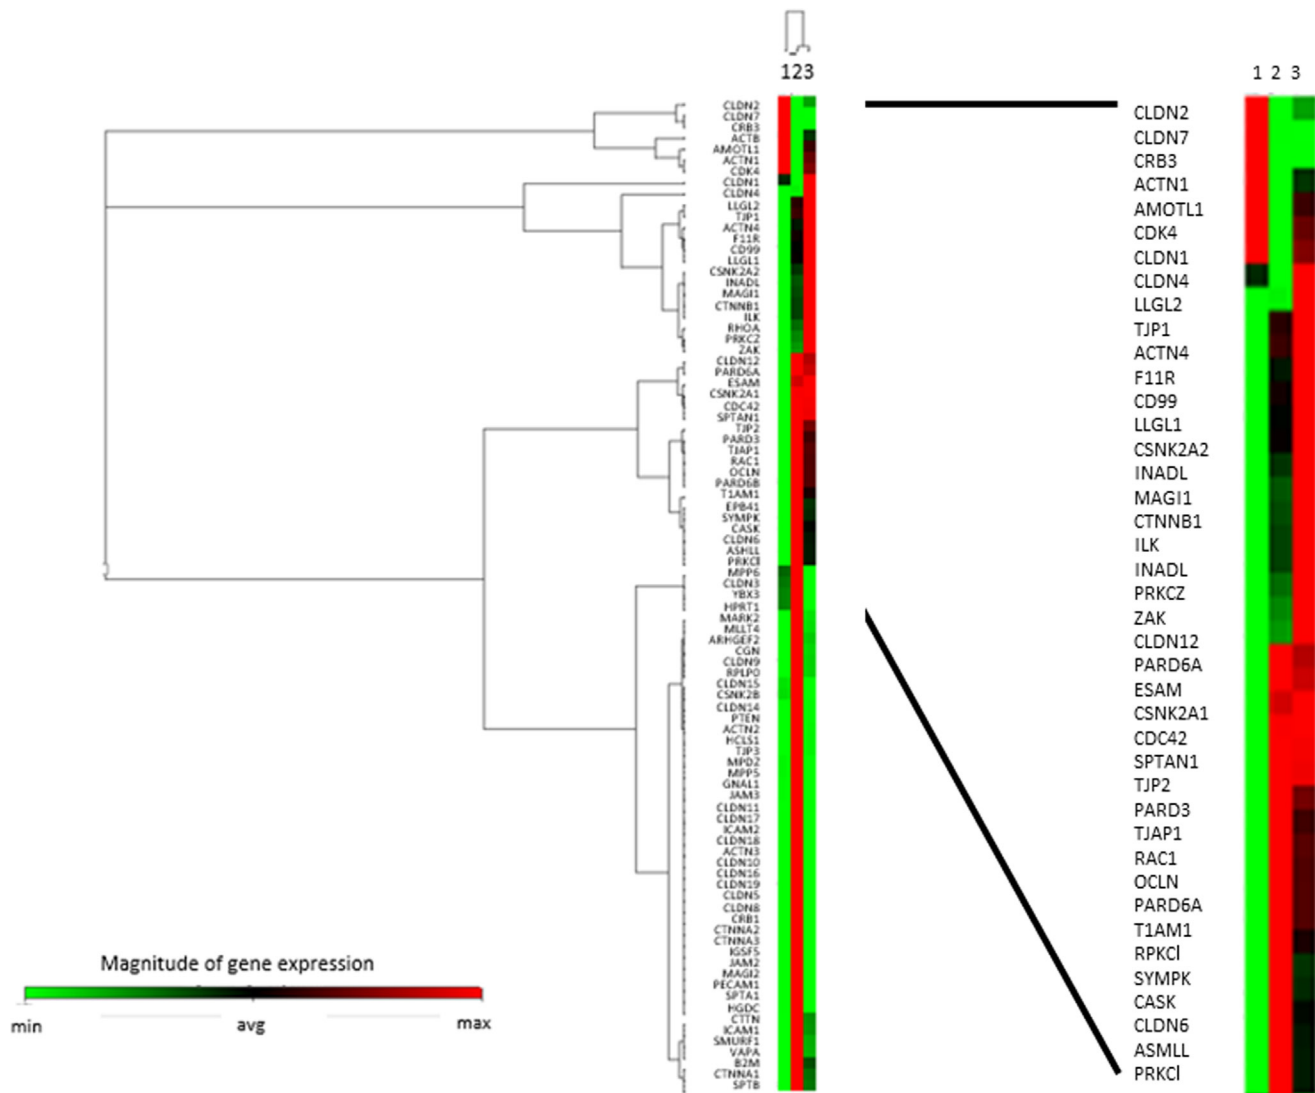

Supplementary Figure 1: The similarity of the phenotype of TJ gene expressions in AGS, rather than MKN45, to that of human gastric mucosal tissue after *H.pylori* eradication.
